# Supplementary material for: Real-World Prescription Patterns and Barriers Related to the Use of Sodium-Glucose Cotransporter 2 Inhibitors among Korean Patients with Type 2 Diabetes Mellitus and Cardiovascular Disease
Source: PubMed Central journal article supplement — Diabetes Metab J. 2022 Jun 3;46(5):701–12. doi: 10.4093/dmj.2022.0002 (PMC9532175; doi:10.4093/dmj.2022.0002), 2022-06-03
Supplement: dmj-2022-0002-suppl1.pdf [file dmj-2022-0002-suppl1.pdf]

**Supplementary Table 1.** Operational definitions of type 2 diabetes mellitus and its related comorbidities

|                                          | Operational definition of diagnosis                                                                                                                                            |
|------------------------------------------|--------------------------------------------------------------------------------------------------------------------------------------------------------------------------------|
| Type 2 diabetes mellitus from claim DB   | ICD-10 code of type 2 diabetes mellitus (E11-E14) as the principal diagnosis or up to a fourth additional diagnosis+prescribed at least one anti-diabetic drug in a given year |
| Hypertension from claim DB               | ≥1 claim/year for antihypertensive medication under ICD-10 code of I10-I13, I15                                                                                                |
| Dyslipidemia from claim DB               | ≥1 claim/year for anti-dyslipidemia agents under ICD-10 code of E78                                                                                                            |
| Anti-diabetic medications                | Sulfonylurea, metformin, DPP-4i, alpha-glucosidase inhibitor, meglitinide, thiazolidinedione, insulins, GLP-1RA, SGLT2i                                                        |
| CVD                                      |                                                                                                                                                                                |
| ASCVD                                    | IHD (+hospitalization <sup>a</sup> ) or stroke (+hospitalization and CT/MRI scan <sup>a</sup> )                                                                                |
| IHD                                      | I20-25                                                                                                                                                                         |
| Acute myocardial infarction              | I21, I22                                                                                                                                                                       |
| Percutaneous coronary intervention (PCI) | I20-I25 & M6551-4, M6561-7, M6571-2                                                                                                                                            |
| Coronary artery bypass graft (CABG)      | I20-I25 & O1640-2, O6147-9, OA640-2, OA647-9                                                                                                                                   |
| (Ischemic) stroke                        | I63, I64                                                                                                                                                                       |
| Heart failure                            | I50 (+hospitalization <sup>a</sup> )                                                                                                                                           |

DB, database; ICD-10, International Classification of Disease, 10th revision; DPP-4i, dipeptidyl peptidase-4 inhibitor; GLP-1RA, glucagon-like peptide-1 receptor agonist; SGLT2i, sodium-glucose cotransporter 2 inhibitor; CVD, cardiovascular disease; ASCVD, atherosclerotic cardiovascular disease; IHD, ischemic heart disease; CT, computed tomography; MRI, magnetic resonance imaging.

<sup>a</sup>For incident cases.
