# Supplementary material for: Real-World Prescription Patterns and Barriers Related to the Use of Sodium-Glucose Cotransporter 2 Inhibitors among Korean Patients with Type 2 Diabetes Mellitus and Cardiovascular Disease
Source: PubMed Central journal article supplement — Diabetes Metab J. 2022 Jun 3;46(5):701–12. doi: 10.4093/dmj.2022.0002 (PMC9532175; doi:10.4093/dmj.2022.0002), 2022-06-03
Supplement: dmj-2022-0002-suppl2.pdf [file dmj-2022-0002-suppl2.pdf]

**Supplementary Table 2.** Lists of each class of drugs

| ACEi        | ARB         | Beta-blocker | Statins      |
|-------------|-------------|--------------|--------------|
| Alacepril   | Candesartan | Amosulalol   | Atorvastatin |
| Benazepril  | Irbesartan  | Atenolol     | Fluvastatin  |
| Captopril   | Losartan    | Betaxolol    | Pitavastatin |
| Cilazapril  | Valsartan   | Bevantolol   | Pravastatin  |
| Delapril    | Telmisartan | Carvedilol   | Rosuvastatin |
| Enalapril   | Eprosartan  | Atenolol     | Simvastatin  |
| Fosinopril  | Olmesartan  | Metoprolol   | Lovastatin   |
| Imidapril   | Fimasartan  | Bisoprolol   |              |
| Lisinopril  | Azilsartan  | Nebivolol    |              |
| Moexipril   |             | Labetalol    |              |
| Perindopril |             |              |              |
| Quinapril   |             |              |              |
| Ramipril    |             |              |              |
| Temocapril  |             |              |              |
| Zofenopril  |             |              |              |

ACEi, angiotensin-converting-enzyme inhibitor; ARB, angiotensin receptor blocker.
