# Supplementary material for: Real-World Prescription Patterns and Barriers Related to the Use of Sodium-Glucose Cotransporter 2 Inhibitors among Korean Patients with Type 2 Diabetes Mellitus and Cardiovascular Disease
Source: PubMed Central journal article supplement — Diabetes Metab J. 2022 Jun 3;46(5):701–12. doi: 10.4093/dmj.2022.0002 (PMC9532175; doi:10.4093/dmj.2022.0002), 2022-06-03
Supplement: dmj-2022-0002-suppl3.pdf [file dmj-2022-0002-suppl3.pdf]

**Supplementary Table 3.** Baseline characteristics of the study population (2015 to 2019)

| Characteristic                      | T2DM (all) <sup>a</sup> | T2DM+ASCVD <sup>b</sup> | T2DM+HF <sup>b</sup> |
|-------------------------------------|-------------------------|-------------------------|----------------------|
| Number                              | 4,736,493               | 1,720,996               | 783,378              |
| Age, yr                             | 61.8 ± 13.1             | 67.7 ± 11.6             | 69.7 ± 12.1          |
| Male sex                            | 2,642,345 (55.8)        | 929,289 (54.0)          | 405,055 (51.7)       |
| Urban residents                     | 2,063,227 (43.6)        | 727,665 (42.3)          | 317,272 (40.5)       |
| Income (lowest 25%)                 | 1,226,679 (25.9)        | 480,604 (27.9)          | 232,938 (29.7)       |
| <b>Incomes</b>                      |                         |                         |                      |
| Basic livelihood security recipient | 362,946 (7.7)           | 183,463 (10.7)          | 98,719 (12.6)        |
| Quartile 1                          | 863,733 (18.2)          | 297,141 (17.3)          | 134,219 (17.1)       |
| Quartile 2                          | 838,631 (17.7)          | 267,983 (15.6)          | 118,189 (15.1)       |
| Quartile 3                          | 1,090,330 (23.0)        | 365,474 (21.2)          | 161,358 (20.6)       |
| Quartile 4 (highest)                | 1,580,853 (33.4)        | 606,935 (35.3)          | 270,893 (34.6)       |
| <b>Anti-diabetic drugs</b>          |                         |                         |                      |
| Metformin (yes)                     | 4,033,190 (85.2)        | 1,392,190 (80.9)        | 582,777 (74.4)       |
| DPP-4i (yes)                        | 2,364,640 (49.9)        | 958,080 (55.7)          | 459,059 (58.6)       |
| Sulfonylureas (yes)                 | 1,915,899 (40.5)        | 770,741 (44.8)          | 344,289 (44.0)       |
| Insulin (yes)                       | 877,195 (18.5)          | 525,222 (30.5)          | 346,238 (44.2)       |
| TZD (yes)                           | 392,026 (8.3)           | 170,162 (9.9)           | 78,297 (10.0)        |
| AGI (yes)                           | 171,902 (3.6)           | 73,157 (4.3)            | 30,082 (3.8)         |
| Meglitinides (yes)                  | 39,899 (0.8)            | 21,493 (1.3)            | 11,576 (1.5)         |
| SGLT2i (yes)                        | 198,566 (4.2)           | 89,472 (5.2)            | 47,258 (6.0)         |
| GLP-1RA (yes)                       | 4,491 (0.1)             | 5,484 (0.3)             | 3,747 (0.5)          |
| <b>CV medications</b>               |                         |                         |                      |
| ACEi/ARB (yes)                      | 2,372,207 (50.1)        | 1,092,182 (63.5)        | 529,111 (67.5)       |
| Statins (yes)                       | 2,717,847 (57.4)        | 1,247,226 (72.5)        | 551,554 (70.4)       |
| ASA (yes)                           | 1,315,742 (27.8)        | 910,874 (52.9)          | 401,663 (51.3)       |
| Beta-blockers (yes)                 | 560,010 (11.8)          | 407,463 (23.7)          | 260,705 (33.3)       |
| <b>Comorbidities</b>                |                         |                         |                      |
| Hypertension (yes)                  | 2,921,189 (61.7)        | 1,356,887 (78.8)        | 669,186 (85.4)       |
| Dyslipidemia (yes)                  | 2,851,332 (60.2)        | 1,267,993 (73.7)        | 559,063 (71.4)       |

Values are presented as mean ± standard deviation or number (%).

T2DM, type 2 diabetes mellitus; ASCVD, atherosclerotic cardiovascular disease; HF, heart failure; DPP-4i, dipeptidyl peptidase-4 inhibitor; TZD, thiazolidinedione; AGI, alpha-glucosidase inhibitor; SGLT2i, sodium-glucose cotransporter 2 inhibitor; GLP-1RA, glucagon-like peptide 1 receptor agonist; CV, cardiovascular; ACEi, angiotensin-converting enzyme inhibitor; ARB, angiotensin receptor blocker; ASA, aspirin.

<sup>a</sup>Data base on the year in which the International Classification of Disease, 10th revision (ICD-10) code corresponding to T2DM was first identified, <sup>b</sup>Data based on the year in which the ICD-10 code corresponding to ASCVD or HF was first identified among patients with T2DM.
