# Supplementary material for: Real-World Prescription Patterns and Barriers Related to the Use of Sodium-Glucose Cotransporter 2 Inhibitors among Korean Patients with Type 2 Diabetes Mellitus and Cardiovascular Disease
Source: PubMed Central journal article supplement — Diabetes Metab J. 2022 Jun 3;46(5):701–12. doi: 10.4093/dmj.2022.0002 (PMC9532175; doi:10.4093/dmj.2022.0002), 2022-06-03
Supplement: dmj-2022-0002-suppl4.pdf [file dmj-2022-0002-suppl4.pdf]

**Supplementary Table 4.** Factors associated with SGLT2i initiation among patients with type 2 diabetes mellitus and ASCVD

| Variable           | SGLT2i treatment |               | Unadjusted OR<br>(95% CI)     | Adjusted OR<br>(95% CI)       |
|--------------------|------------------|---------------|-------------------------------|-------------------------------|
|                    | Non-user         | User          |                               |                               |
| Age (/10 years)    |                  |               | 0.58 (0.58–0.59) <sup>a</sup> | 0.57 (0.56–0.57) <sup>a</sup> |
| Sex                |                  |               |                               |                               |
| Male               | 244,192 (84.4)   | 45,155 (15.6) | 1 (reference)                 | 1 (reference)                 |
| Female             | 203,121 (88.6)   | 26,104 (11.4) | 0.69 (0.68–0.70) <sup>a</sup> | 0.99 (0.98–1.01)              |
| Residents          |                  |               |                               |                               |
| Urban              | 182,017 (85.8)   | 30,135 (14.2) | 1 (reference)                 | 1 (reference)                 |
| Rural              | 265,296 (86.6)   | 41,124 (13.4) | 0.94 (0.92–0.95) <sup>a</sup> | 0.95 (0.93–0.97) <sup>a</sup> |
| Household income   |                  |               |                               |                               |
| High (75%)         | 314,923 (86.1)   | 50,900 (13.9) | 1 (reference)                 | 1 (reference)                 |
| Low (25%)          | 132,390 (86.7)   | 20,359 (13.3) | 0.95 (0.93–0.97) <sup>a</sup> | 0.93 (0.92–0.95) <sup>a</sup> |
| Antidiabetic drugs |                  |               |                               |                               |
| Metformin          |                  |               |                               |                               |
| No                 | 145,496 (92.0)   | 12,614 (8.0)  | 1 (reference)                 | 1 (reference)                 |
| Yes                | 301,817 (83.7)   | 58,645 (16.3) | 2.24 (2.2–2.29) <sup>a</sup>  | 1.83 (1.79–1.87) <sup>a</sup> |
| Sulfonylurea       |                  |               |                               |                               |
| No                 | 287,170 (88.0)   | 39,267 (12.0) | 1 (reference)                 | 1 (reference)                 |
| Yes                | 160,143 (83.4)   | 31,992 (16.7) | 1.46 (1.44–1.49) <sup>a</sup> | 1.51 (1.49–1.54) <sup>a</sup> |
| Insulin            |                  |               |                               |                               |
| No                 | 326,165 (85.0)   | 57,753 (15.0) | 1 (reference)                 | 1 (reference)                 |
| Yes                | 121,148 (90.0)   | 13,506 (10.0) | 0.63 (0.62–0.64) <sup>a</sup> | 0.83 (0.81–0.85) <sup>a</sup> |
| DPP-4i             |                  |               |                               |                               |
| No                 | 244,986 (86.5)   | 38,234 (13.5) | 1 (reference)                 | 1 (reference)                 |
| Yes                | 202,327 (86.0)   | 33,025 (14.0) | 1.05 (1.03–1.06) <sup>a</sup> | 0.82 (0.81–0.84) <sup>a</sup> |
| Comorbidities      |                  |               |                               |                               |
| Hypertension       |                  |               |                               |                               |
| No                 | 79,987 (85.5)    | 13,548 (14.5) | 1 (reference)                 | 1 (reference)                 |
| Yes                | 367,326 (86.4)   | 57,711 (13.6) | 0.93 (0.91–0.95) <sup>a</sup> | 0.92 (0.89–0.95) <sup>a</sup> |
| Dyslipidemia       |                  |               |                               |                               |
| No                 | 116,815 (93.2)   | 8,595 (6.9)   | 1 (reference)                 | 1 (reference)                 |
| Yes                | 330,498 (84.1)   | 62,664 (15.9) | 2.58 (2.52–2.64) <sup>a</sup> | 1.52 (1.44–1.61) <sup>a</sup> |
| CV medications     |                  |               |                               |                               |
| ACEi/ARB           |                  |               |                               |                               |
| No                 | 150,449 (87.8)   | 20,850 (12.2) | 1 (reference)                 | 1 (reference)                 |
| Yes                | 296,864 (85.5)   | 50,409 (14.5) | 1.23 (1.20–1.25) <sup>a</sup> | 1.28 (1.24–1.31) <sup>a</sup> |
| Statins            |                  |               |                               |                               |
| No                 | 116,498 (92.8)   | 9,064 (7.2)   | 1 (reference)                 | 1 (reference)                 |
| Yes                | 330,815 (84.2)   | 62,195 (15.8) | 2.42 (2.36–2.47) <sup>a</sup> | 1.37 (1.29–1.45) <sup>a</sup> |
| ASA                |                  |               |                               |                               |
| No                 | 157,871 (89.3)   | 18,994 (10.7) | 1 (reference)                 | 1 (reference)                 |
| Yes                | 289,442 (84.7)   | 52,265 (15.3) | 1.50 (1.47–1.53) <sup>a</sup> | 1.38 (1.36–1.41) <sup>a</sup> |
| ASCVD              |                  |               |                               |                               |
| Stroke             | 101,595 (90.8)   | 10,243 (9.2)  | 1 (reference)                 | 1 (reference)                 |
| IHD                | 313,014 (84.6)   | 57,079 (15.4) | 1.81 (1.77–1.85) <sup>a</sup> | 1.69 (1.66–1.74) <sup>a</sup> |

Values are presented as number (%).

SGLT2i, sodium-glucose cotransporter 2 inhibitor; ASCVD, atherosclerotic cardiovascular disease; OR, odds ratio; CI, confidence interval; DPP-4i, dipeptidyl peptidase-4 inhibitor; CV, cardiovascular; ACEi, angiotensin-converting enzyme inhibitor; ARB, angiotensin receptor blocker; ASA, aspirin; IHD, ischemic heart disease.

<sup>a</sup> $P < 0.0001$ .
