# Supplementary material for: Real-World Prescription Patterns and Barriers Related to the Use of Sodium-Glucose Cotransporter 2 Inhibitors among Korean Patients with Type 2 Diabetes Mellitus and Cardiovascular Disease
Source: PubMed Central journal article supplement — Diabetes Metab J. 2022 Jun 3;46(5):701–12. doi: 10.4093/dmj.2022.0002 (PMC9532175; doi:10.4093/dmj.2022.0002), 2022-06-03
Supplement: dmj-2022-0002-suppl5.pdf [file dmj-2022-0002-suppl5.pdf]

**Supplementary Table 5.** Factors associated with SGLT2i initiation among patients with type 2 diabetes mellitus and heart failure

| Variable            | SGLT2i treatment |               | Unadjusted OR<br>(95% CI)     | Adjusted OR<br>(95% CI)       |
|---------------------|------------------|---------------|-------------------------------|-------------------------------|
|                     | Non-user         | User          |                               |                               |
| Age (/10 years)     |                  |               | 0.60 (0.60–0.61) <sup>c</sup> | 0.57 (0.57–0.58) <sup>c</sup> |
| Sex                 |                  |               |                               |                               |
| Male                | 171,668 (87.4)   | 24,790 (12.6) | 1 (reference)                 | 1 (reference)                 |
| Female              | 159,468 (90.4)   | 16,927 (9.6)  | 0.74 (0.72–0.75) <sup>c</sup> | 0.97 (0.95–0.99) <sup>b</sup> |
| Residents           |                  |               |                               |                               |
| Urban               | 132,026 (88.3)   | 17,426 (11.7) | 1 (reference)                 | 1 (reference)                 |
| Rural               | 199,110 (89.1)   | 24,291 (10.9) | 0.92 (0.91–0.94) <sup>c</sup> | 0.93 (0.91–0.95) <sup>c</sup> |
| Household income    |                  |               |                               |                               |
| High (75%)          | 229,444 (88.9)   | 28,759 (11.1) | 1 (reference)                 | 1 (reference)                 |
| Low (25%)           | 101,692 (88.7)   | 12,958 (11.3) | 1.02 (0.99–1.04)              | 0.95 (0.93–0.98) <sup>c</sup> |
| Anti-diabetic drugs |                  |               |                               |                               |
| Metformin           |                  |               |                               |                               |
| No                  | 128,394 (93.7)   | 8,706 (6.4)   | 1 (reference)                 | 1 (reference)                 |
| Yes                 | 202,742 (86.0)   | 33,011 (14.0) | 2.40 (2.34–2.46) <sup>c</sup> | 1.97 (1.92–2.03) <sup>c</sup> |
| Sulfonylurea        |                  |               |                               |                               |
| No                  | 218,977 (90.4)   | 23,336 (9.6)  | 1 (reference)                 | 1 (reference)                 |
| Yes                 | 112,159 (85.9)   | 18,381 (14.1) | 1.54 (1.51–1.57) <sup>c</sup> | 1.49 (1.45–1.52) <sup>c</sup> |
| Insulin             |                  |               |                               |                               |
| No                  | 226,645 (87.3)   | 33,115 (12.8) | 1 (reference)                 | 1 (reference)                 |
| Yes                 | 104,491 (92.4)   | 8,602 (7.6)   | 0.56 (0.55–0.58) <sup>c</sup> | 0.73 (0.71–0.75) <sup>c</sup> |
| DPP-4i              |                  |               |                               |                               |
| No                  | 178,587 (88.9)   | 22,282 (11.1) | 1 (reference)                 | 1 (reference)                 |
| Yes                 | 152,549 (88.7)   | 19,435 (11.3) | 1.02 (1.00–1.04) <sup>a</sup> | 0.75 (0.74–0.77) <sup>c</sup> |
| Comorbidities       |                  |               |                               |                               |
| Hypertension        |                  |               |                               |                               |
| No                  | 55,219 (89.2)    | 6,709 (10.8)  | 1 (reference)                 | 1 (reference)                 |
| Yes                 | 275,917 (88.7)   | 35,008 (11.3) | 1.04 (1.02–1.07) <sup>b</sup> | 0.98 (0.94–1.02)              |
| Dyslipidemia        |                  |               |                               |                               |
| No                  | 113,012 (94.4)   | 6,667 (5.6)   | 1 (reference)                 | 1 (reference)                 |
| Yes                 | 218,124 (86.2)   | 35,050 (13.8) | 2.72 (2.65–2.80) <sup>c</sup> | 1.59 (1.48–1.72) <sup>c</sup> |
| CV medications      |                  |               |                               |                               |
| ACEi/ARB (yes)      |                  |               |                               |                               |
| No                  | 114,115 (90.7)   | 11,668 (9.3)  | 1 (reference)                 | 1 (reference)                 |
| Yes                 | 217,021 (87.8)   | 30,049 (12.2) | 1.35 (1.32–1.39) <sup>c</sup> | 1.30 (1.26–1.34) <sup>c</sup> |
| Beta-blocker (yes)  |                  |               |                               |                               |
| No                  | 222,043 (89.6)   | 25,810 (10.4) | 1 (reference)                 | 1 (reference)                 |
| Yes                 | 109,093 (87.3)   | 15,907 (12.7) | 1.25 (1.23–1.28) <sup>c</sup> | 1.16 (1.14–1.19) <sup>c</sup> |

Values are presented as number (%).

SGLT2i, sodium-glucose cotransporter 2 inhibitor; OR, odds ratio; CI, confidence interval; DPP-4i, dipeptidyl peptidase-4 inhibitor; CV, cardiovascular; ACEi, angiotensin-converting enzyme inhibitor; ARB, angiotensin receptor blocker.

<sup>a</sup>*P*<0.05, <sup>b</sup>*P*<0.001, <sup>c</sup>*P*<0.0001.
