# Supplementary material for: Real-World Prescription Patterns and Barriers Related to the Use of Sodium-Glucose Cotransporter 2 Inhibitors among Korean Patients with Type 2 Diabetes Mellitus and Cardiovascular Disease
Source: PubMed Central journal article supplement — Diabetes Metab J. 2022 Jun 3;46(5):701–12. doi: 10.4093/dmj.2022.0002 (PMC9532175; doi:10.4093/dmj.2022.0002), 2022-06-03
Supplement: dmj-2022-0002-suppl8.pdf [file dmj-2022-0002-suppl8.pdf]

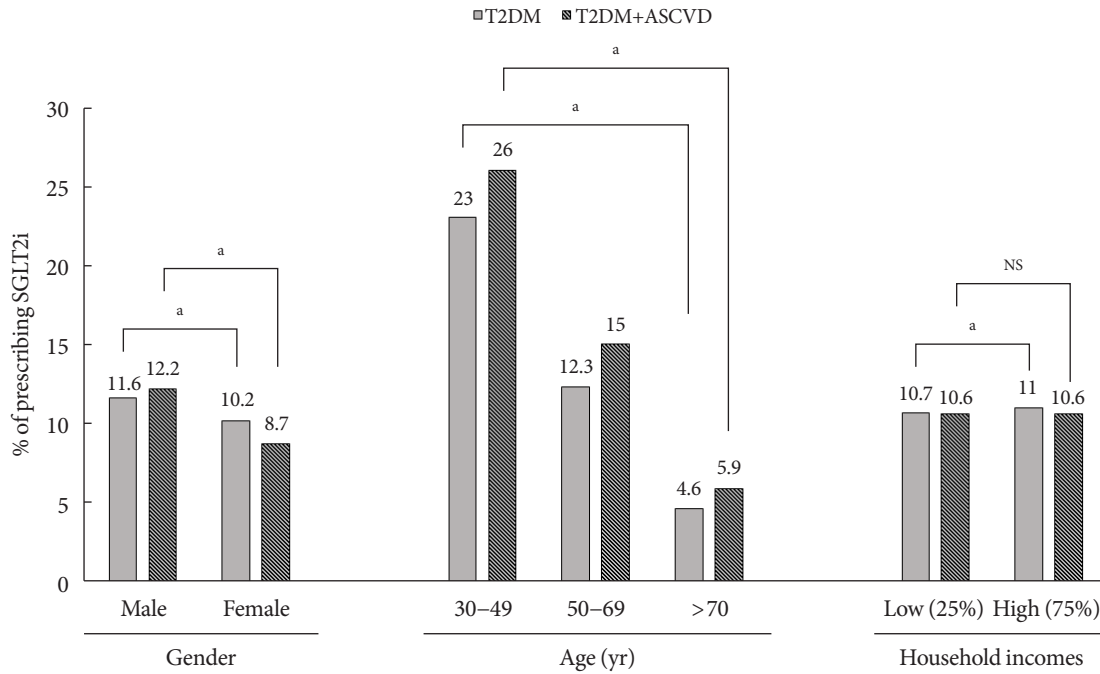

**Supplementary Fig. 3.** Proportion of those prescribed sodium-glucose cotransporter 2 inhibitor (SGLT2i) in patients with type 2 diabetes mellitus (T2DM) or accompanied atherosclerotic cardiovascular disease (ASCVD) according to gender, age, and income level in 2019. NS, not significant. <sup>a</sup>*P* < 0.0001.
